# Supplementary material
Source: PubMed Central journal article supplement (PMC3941978)

# SUPPORTING INFORMATION

## Polychlorinated Biphenyls in Residential Dust: Sources of Variability

Todd P. Whitehead<sup>1\*</sup>, F. Reber Brown<sup>2</sup>, Catherine Metayer<sup>1</sup>, June-Soo Park<sup>2</sup>, Monique Does<sup>1</sup>, Myrto X. Petreas<sup>2</sup>, Patricia A. Buffler<sup>1</sup>, Stephen M. Rappaport<sup>1</sup>

<sup>1</sup> University of California, Berkeley, School of Public Health, 50 University Hall, MC 7360, Berkeley, CA 94720, USA

<sup>2</sup> California Department of Toxic Substances Control, Environmental Chemistry Laboratory, 700 Heinz Ave., Berkeley, CA 94710, USA

Supporting Information includes 14 pages, 8 tables, and 2 figures.

### *Estimating indoor half-lives of PCBs*

Based on  $\beta_{time}$ , a linear combination of the regression coefficients for the four time trends included in Model 2 (*i.e.*,  $\beta_{time} = \beta_{time-reference} + x_{cases} * \beta_{time-cases} + x_{floor} * \beta_{time-floor} + x_{cons} * \beta_{time-construction}$ ), we estimated the indoor half-life of each PCB:

$$t_{1/2} = \frac{\ln(0.5)}{\beta_{time}}$$

For the population average (*i.e.*, for  $x_{cases} = 38\%$ ,  $x_{floor} = 45\%$ , and  $x_{cons} = 39\%$  of homes in the study population), for case households (*i.e.*, subbing  $x_{cases} = 1$ ), for households that installed flooring between sampling rounds (*i.e.*, subbing  $x_{floor} = 1$ ), and for households that did construction between sampling rounds (*i.e.*, subbing  $x_{cons} = 1$ ).

**Supporting Information, Table S1.** Description of analytical standards.

| Standard                                       | Timing of Spike     | Purpose           | Supplier                       | Product | Purity, % |
|------------------------------------------------|---------------------|-------------------|--------------------------------|---------|-----------|
| <sup>13</sup> C <sub>12</sub> -labeled PCB-28  | Prior to extraction | Internal Standard | Wellington Laboratories        | MBP-MXE | 99        |
| <sup>13</sup> C <sub>12</sub> -labeled PCB-52  | Prior to extraction | Internal Standard | Wellington Laboratories        | MBP-MXE | 99        |
| <sup>13</sup> C <sub>12</sub> -labeled PCB-101 | Prior to extraction | Internal Standard | Wellington Laboratories        | MBP-MXE | 99        |
| <sup>13</sup> C <sub>12</sub> -labeled PCB-105 | Prior to extraction | Internal Standard | Wellington Laboratories        | MBP-MO  | 99        |
| <sup>13</sup> C <sub>12</sub> -labeled PCB-114 | Prior to extraction | Internal Standard | Wellington Laboratories        | MBP-MO  | 99        |
| <sup>13</sup> C <sub>12</sub> -labeled PCB-118 | Prior to extraction | Internal Standard | Wellington Laboratories        | MBP-MO  | 99        |
| <sup>13</sup> C <sub>12</sub> -labeled PCB-138 | Prior to extraction | Internal Standard | Wellington Laboratories        | MBP-MXE | 99        |
| <sup>13</sup> C <sub>12</sub> -labeled PCB-153 | Prior to extraction | Internal Standard | Wellington Laboratories        | MBP-MXE | 99        |
| <sup>13</sup> C <sub>12</sub> -labeled PCB-156 | Prior to extraction | Internal Standard | Wellington Laboratories        | MBP-MO  | 99        |
| <sup>13</sup> C <sub>12</sub> -labeled PCB-157 | Prior to extraction | Internal Standard | Wellington Laboratories        | MBP-MO  | 99        |
| <sup>13</sup> C <sub>12</sub> -labeled PCB-167 | Prior to extraction | Internal Standard | Wellington Laboratories        | MBP-MO  | 99        |
| <sup>13</sup> C <sub>12</sub> -labeled PCB-180 | Prior to extraction | Internal Standard | Wellington Laboratories        | MBP-MXE | 99        |
| <sup>13</sup> C <sub>12</sub> -labeled PCB-189 | Prior to extraction | Internal Standard | Wellington Laboratories        | MBP-MO  | 99        |
| <sup>13</sup> C <sub>12</sub> -labeled PCB-194 | Prior to extraction | Internal Standard | Cambridge Isotope Laboratories | EC-1418 | 99        |
| <sup>13</sup> C <sub>12</sub> -labeled PCB-209 | Prior to extraction | Internal Standard | Wellington Laboratories        | MBP-MXE | 99        |
| <sup>13</sup> C <sub>12</sub> -labeled PCB-47  | Prior to analysis   | Recovery Standard | Cambridge Isotope Laboratories | EC-1434 | 99        |
| <sup>13</sup> C <sub>12</sub> -labeled PCB-128 | Prior to analysis   | Recovery Standard | Cambridge Isotope Laboratories | EC-1411 | 99        |
| <sup>13</sup> C <sub>12</sub> -labeled PCB-178 | Prior to analysis   | Recovery Standard | Cambridge Isotope Laboratories | EC-1417 | 99        |

**Supporting Information, Table S2.** Coefficient of variation between concentrations of selected PCBs in matched samples.

| PCB     | Inter-batch quality control, NIST SRM 2585, N=14 | Intra-batch quality control, duplicate samples, N=55 pairs | Inter-batch quality control, replicate samples, N=40 | Repeat samples, Round 1 & Round 2, N=201 pairs |
|---------|--------------------------------------------------|------------------------------------------------------------|------------------------------------------------------|------------------------------------------------|
| PCB-28  | 8                                                | 20                                                         | 36                                                   | 71                                             |
| PCB-52  | 9                                                | 31                                                         | 53                                                   | 67                                             |
| PCB-101 | 10                                               | 44                                                         | 59                                                   | 79                                             |
| PCB-105 | 7                                                | 66                                                         | 75                                                   | 92                                             |
| PCB-118 | 11                                               | 37                                                         | 62                                                   | 86                                             |
| PCB-138 | 8                                                | 42                                                         | 54                                                   | 113                                            |
| PCB-153 | 11                                               | 39                                                         | 77                                                   | 80                                             |
| PCB-180 | 7                                                | 46                                                         | 62                                                   | 89                                             |

NIST SRM 2585 = National Institute of Standards and Technology Standard Reference Material 2585

**Supporting Information, Table S3.** Questions and responses used to create covariates for mixed-effects models.

| Question                                                                                                                                                                                                                                                                                                                                                                                                                                                                                                                                                                                                                                                                                                                                                                                                                                                                                                                                                                                                                                                    | Possible Responses                            | Mixed-Effects Model Parameterization |
|-------------------------------------------------------------------------------------------------------------------------------------------------------------------------------------------------------------------------------------------------------------------------------------------------------------------------------------------------------------------------------------------------------------------------------------------------------------------------------------------------------------------------------------------------------------------------------------------------------------------------------------------------------------------------------------------------------------------------------------------------------------------------------------------------------------------------------------------------------------------------------------------------------------------------------------------------------------------------------------------------------------------------------------------------------------|-----------------------------------------------|--------------------------------------|
| Does your vacuum cleaner have a disposable bag?                                                                                                                                                                                                                                                                                                                                                                                                                                                                                                                                                                                                                                                                                                                                                                                                                                                                                                                                                                                                             | Yes or No                                     | 1 if yes; 0 if no                    |
| In the last 12 months, on average, how often were the rugs and floors in this home usually vacuumed?                                                                                                                                                                                                                                                                                                                                                                                                                                                                                                                                                                                                                                                                                                                                                                                                                                                                                                                                                        | <1/month,<br>1-3/month,<br>1/week,<br>>1/week | Not Included in Model                |
| In the last 12 months, did all of the people who lived in this home usually take off their shoes when entering the home?                                                                                                                                                                                                                                                                                                                                                                                                                                                                                                                                                                                                                                                                                                                                                                                                                                                                                                                                    | Yes or No                                     | Not Included in Model                |
| <p>In the last 12 months, has anyone living in this house had a job...</p> <p>...as an airplane mechanic?</p> <p>...as an artist or art teacher?</p> <p>...as a cleaner or janitor?</p> <p>...as a construction worker or carpenter?</p> <p>...as a dentist or dental worker?</p> <p>...as a electrician, lineman, or cable puller?</p> <p>...as an engineer or environmental scientist?</p> <p>...as a farmer, farm worker, or ranch worker?</p> <p>...as a gardener, groundskeeper, landscaper, or nursery worker?</p> <p>...as a laboratory worker or lab science teacher?</p> <p>...in manufacturing, assembly, industrial operations, or product repair?</p> <p>...as a auto, truck, or bus mechanic?</p> <p>...as a medical patient care worker?</p> <p>...as an agricultural packer?</p> <p>...as a painter or wallpaperer?</p> <p>...in pesticide handling, production, formulation, or mixing?</p> <p>...as a photographer, framer, or photography teacher?</p> <p>...as a teacher of preschool to 5th grade?</p> <p>...as a welder or joiner?</p> | Yes or No                                     | Not Included in Model                |
| <p>Is this residence best described as a single family residence?</p> <p>Is this residence best described as a duplex/townhouse?</p> <p>Is this residence best described as an apartment/condominium?</p> <p>Is this residence best described as a mobile home?</p>                                                                                                                                                                                                                                                                                                                                                                                                                                                                                                                                                                                                                                                                                                                                                                                         | Yes or No                                     | Not Included in Model                |
| In what year was your home built?                                                                                                                                                                                                                                                                                                                                                                                                                                                                                                                                                                                                                                                                                                                                                                                                                                                                                                                                                                                                                           | Continuous                                    | Years*10                             |
| About how many square feet is your residence (include all heated areas in the home or apartment that are suitable for year-round use)                                                                                                                                                                                                                                                                                                                                                                                                                                                                                                                                                                                                                                                                                                                                                                                                                                                                                                                       | Continuous                                    | sf*500                               |
| How many rooms are there in your residence, excluding closets, crawl spaces, attics and basements?                                                                                                                                                                                                                                                                                                                                                                                                                                                                                                                                                                                                                                                                                                                                                                                                                                                                                                                                                          | Continuous                                    | Not Included in Model                |
| <p>Is your residence mostly constructed of wood?</p> <p>Is your residence mostly constructed of mason/brick/cement?</p> <p>Is your residence mostly constructed of pre-fabricated panels?</p>                                                                                                                                                                                                                                                                                                                                                                                                                                                                                                                                                                                                                                                                                                                                                                                                                                                               | Yes or No                                     | Not Included in Model                |

**Supporting Information, Table S3, continued.** Questions and responses used to create covariates for mixed-effects models.

| Question                                                                                                                                                                                                                         | Possible Responses                                                                                            | Mixed-Effects Model Parameterization                                           |
|----------------------------------------------------------------------------------------------------------------------------------------------------------------------------------------------------------------------------------|---------------------------------------------------------------------------------------------------------------|--------------------------------------------------------------------------------|
| Does this residence have any type of electric cooling system such as air conditioning?                                                                                                                                           | Yes or No                                                                                                     | Not Included in Model                                                          |
| During the last 12 months, how often was at least one window open on a regular basis during the colder months?<br>During the last 12 months, how often was at least one window open on a regular basis during the warmer months? | 1/day,<br>1/week,<br>few/month,<br>few/year                                                                   | Not Included in Model                                                          |
| Was carpeting installed during the time you have lived in this home?<br>Was roofing installed during the time you have lived in this home?<br>Were windows replaced during the time you have lived in this home?                 | Yes or No                                                                                                     | Not Included in Model                                                          |
| Was flooring installed during the time you have lived in this home?<br>Was construction done during the time you have lived in this home?                                                                                        | Yes or No                                                                                                     | Number of years since Round 1 if no at Round 1 and yes at Round 2; otherwise 0 |
| Is there a cat or dog living in this home?                                                                                                                                                                                       | Yes or No                                                                                                     | Not Included in Model                                                          |
| Approximately what percentage of your home has carpet?                                                                                                                                                                           | <25%,<br>25-49%,<br>50-74%,<br>75-100%                                                                        | Not Included in Model                                                          |
| What is your household annual income?                                                                                                                                                                                            | <\$15,000,<br>\$15-29,000,<br>\$30-44,000,<br>\$45-59,000,<br>\$60-74,000,<br>≥\$75,000                       | Not Included in Model                                                          |
| Is mother Hispanic?                                                                                                                                                                                                              | Yes or No                                                                                                     | Not Included in Model                                                          |
| What is mother's race?                                                                                                                                                                                                           | White or Caucasian,<br>African American,<br>Native American,<br>Asian or Pacific Islander,<br>Mixed or others |                                                                                |
| What is mother's age (at the time of the first dust sampling)?                                                                                                                                                                   | Continuous                                                                                                    | Years*5                                                                        |
| Was the index child diagnosed with leukemia?                                                                                                                                                                                     | Yes or No                                                                                                     | Number of years since Round 1 if yes; 0 if no                                  |

**Supporting Information, Table S4.** Number of households that were unable or unwilling to answer a question from the questionnaire and the value used to replace the missing response in mixed-effects models.

| Question                                                                                                | Number Missing | Value Used        |
|---------------------------------------------------------------------------------------------------------|----------------|-------------------|
| Was flooring installed during the time you have lived in this home?                                     | 1              | 0                 |
| Was construction done during the time you have lived in this home?                                      | 1              | 0                 |
| About how many square feet is your residence?<br>(If respondent provided number of rooms, $N_{Rooms}$ ) | 20             | $220 * N_{Rooms}$ |
| About how many square feet is your residence?<br>(If respondent did not provide number of rooms)        | 2              | 2,000             |
| In what year was your home built?                                                                       | 5              | 1972              |
| What is mother's age?                                                                                   | 0              | NA                |
| Does your vacuum cleaner have a disposable bag?                                                         | 2              | 0                 |

**Supporting Information, Table S5.** Variance explained by each factor considered for inclusion in the mixed-effects models.

| Explanatory Factors                                              | Total | PCB-28, % |     |    | PCB-52, % |    |    | PCB-101, % |    |    | PCB-105, % |    |    | PCB-118, % |    |    | PCB-138, % |     |    | PCB-153, % |    |    | PCB-180, % |    |    |
|------------------------------------------------------------------|-------|-----------|-----|----|-----------|----|----|------------|----|----|------------|----|----|------------|----|----|------------|-----|----|------------|----|----|------------|----|----|
|                                                                  |       | BR        | BH  | WH | BR        | BH | WH | BR         | BH | WH | BR         | BH | WH | BR         | BH | WH | BR         | BH  | WH | BR         | BH | WH | BR         | BH | WH |
| Residential construction date <sup>a, b</sup>                    | 1.92  | 67        | 14  | 0  | 56        | 10 | 0  | 68         | 18 | -1 | 75         | 21 | -6 | 68         | 23 | 0  | 78         | 29  | 0  | 68         | 19 | 0  | 83         | 20 | -1 |
| Surrounding population density <sup>c</sup>                      | 0.39  | 21        | 2   | 2  | 19        | -1 | 0  | 18         | 4  | -2 | 23         | 4  | -5 | 16         | 5  | -2 | 24         | -1  | 3  | 22         | 3  | -2 | 23         | 2  | -2 |
| Flooring between rounds <sup>a, b</sup>                          | 0.34  | 4         | 0   | 10 | 2         | 0  | 5  | 1          | 1  | 10 | 0          | 2  | 7  | 1          | 1  | 5  | 7          | -24 | 31 | 1          | 1  | 8  | 1          | -1 | 8  |
| Residence has air conditioning <sup>b, c</sup>                   | 0.34  | 1         | 3   | 0  | -6        | 5  | 0  | -6         | 7  | 0  | -15        | 9  | 0  | -8         | 10 | 0  | 2          | 12  | 0  | -11        | 10 | 0  | -7         | 7  | 0  |
| Window replacement in residence <sup>b, c</sup>                  | 0.32  | 27        | 3   | 0  | 17        | 1  | 0  | 19         | 1  | 0  | 18         | 1  | -2 | 18         | 1  | 0  | 26         | 4   | 0  | 22         | 2  | 0  | 22         | 1  | 0  |
| Residential square footage <sup>a</sup>                          | 0.23  | -10       | 4   | 0  | -7        | 3  | 0  | -8         | 6  | 0  | -9         | 7  | 0  | -7         | 7  | 0  | -5         | 8   | 0  | -9         | 6  | 0  | -8         | 6  | 0  |
| Number of rooms in residence <sup>c</sup>                        | 0.21  | -11       | 2   | 0  | -6        | 1  | 0  | -8         | 6  | 0  | -10        | 7  | 0  | -8         | 8  | 0  | -6         | 9   | 0  | -10        | 6  | 0  | -7         | 5  | 0  |
| Time between rounds <sup>a</sup>                                 | 0.21  | 2         | -12 | 14 | 1         | -5 | 10 | 0          | -4 | 15 | 0          | -2 | 13 | 1          | -3 | 9  | 4          | -50 | 50 | 1          | -3 | 10 | 1          | -7 | 17 |
| Mother's age <sup>a</sup>                                        | 0.10  | 35        | 5   | 0  | 19        | 1  | 0  | 9          | 0  | 0  | 5          | -1 | 0  | 7          | -1 | 0  | 3          | -1  | 0  | 6          | -1 | 0  | 10         | -1 | 0  |
| Carpeting between rounds <sup>b, c</sup>                         | 0.07  | -2        | -4  | 4  | -2        | 1  | 2  | -3         | -1 | 8  | -3         | 0  | 11 | -2         | -1 | 3  | -6         | -23 | 20 | -2         | -1 | 5  | -3         | -3 | 7  |
| Vacuum has disposable bag <sup>a, b</sup>                        | 0.07  | -4        | -1  | 1  | -3        | 0  | 1  | -6         | 0  | 7  | -8         | 1  | 19 | -7         | 0  | 7  | -8         | -1  | 4  | -6         | 0  | 5  | -10        | 2  | 5  |
| Resident is electrician/lineman                                  | 0.06  | 4         | 0   | 0  | 4         | 1  | 0  | 2          | 1  | 1  | 3          | 0  | 5  | 3          | 0  | 2  | 2          | 0   | 0  | 2          | 0  | 0  | 1          | 0  | 0  |
| Resident is agricultural packer                                  | 0.05  | 8         | 0   | 0  | 0         | 0  | 0  | 3          | 0  | -1 | 2          | 0  | -1 | 5          | 0  | 0  | 5          | 0   | 0  | 4          | 0  | 0  | 5          | 0  | 0  |
| Carpet coverage <sup>b</sup>                                     | 0.05  | 2         | -1  | 0  | 0         | -1 | 0  | 2          | -1 | 0  | 8          | 0  | -1 | 9          | 0  | 0  | 8          | 0   | 0  | 5          | -1 | 0  | 8          | -1 | 0  |
| Resident is teacher                                              | 0.03  | 0         | 2   | 0  | 0         | 0  | 0  | 0          | 0  | 0  | 0          | 1  | -1 | 0          | 0  | -1 | 0          | 0   | 0  | 0          | 1  | 0  | 0          | 2  | 0  |
| Resident is welder/joiner                                        | 0.02  | 6         | -1  | 1  | 4         | -1 | 1  | 3          | 0  | 0  | -2         | -1 | 3  | 1          | 0  | -1 | 3          | -3  | 1  | 3          | 0  | 0  | 1          | 0  | 0  |
| Resident is construction worker/carpenter                        | 0.01  | 1         | 0   | 0  | -1        | 1  | -1 | -1         | 2  | -1 | -1         | 1  | -2 | -1         | 1  | -1 | -2         | 2   | 0  | -1         | 1  | -1 | 0          | 0  | 0  |
| Resident is laboratory worker/teacher                            | 0.01  | 0         | -1  | 0  | 0         | 0  | 0  | 0          | 0  | -1 | 0          | 0  | -2 | -1         | 1  | -1 | -2         | 2   | -1 | -1         | 1  | -1 | -2         | 3  | -1 |
| Resident is gardener/groundskeeper/<br>landscaper/nursery worker | 0.01  | 0         | -1  | 0  | 0         | 0  | 0  | 0          | 1  | -1 | 0          | 0  | -2 | 0          | 0  | -1 | 0          | 1   | 1  | 0          | 1  | -1 | 0          | 0  | 0  |
| Resident is artist/art teacher                                   | 0.00  | -4        | 0   | 1  | -1        | -1 | 1  | 0          | -1 | 3  | 0          | -1 | 4  | 0          | 0  | 0  | -1         | -3  | 3  | -1         | 0  | 1  | 0          | 0  | 1  |
| Resident is cleaner/janitor                                      | 0.00  | 3         | -2  | 1  | 0         | 0  | 0  | 0          | 0  | -1 | -1         | 1  | -2 | -1         | 1  | -1 | -4         | 2   | 0  | 0          | 0  | -1 | -2         | 1  | -1 |
| Resident is dentist/dental worker                                | 0.00  | 0         | 0   | 0  | 0         | 0  | 0  | 0          | 0  | -1 | 0          | 0  | 0  | 0          | 0  | 0  | 0          | -2  | 1  | 0          | 0  | -1 | -1         | 1  | 0  |
| Mother's race/ethnicity                                          | 0.00  | 32        | 5   | 0  | 7         | 1  | 0  | 2          | 0  | 0  | -5         | 0  | 0  | -3         | 0  | 0  | -3         | -1  | 0  | -3         | 0  | 0  | 4          | -2 | 0  |

Total = Total variance (summed over 8 PCB models) explained by the explanatory factor (negative values indicate that the factor does not explain variance in PCB concentrations);

BR = Percent of between-region variance from the random-effects model (Model 1) explained by the explanatory factor;

BH = Percent of intra-regional between-home variance from the random-effects model (Model 1) explained by the explanatory factor;

WH = Percent of within-home variance over time from the random-effects model (Model 1) explained by explanatory factor.

<sup>a</sup> Explanatory factor (or its interaction with the time trend) was included in Model 2

<sup>b</sup> We hypothesized that this factor could influence the indoor half-lives of PCBs, so an interaction between the time trend and this factor was considered for inclusion in Model 2

<sup>c</sup> Factor did not explain additional variance when included in Model 2



**Supporting Information Table S5 Cont'd.** Variance explained by each factor considered for inclusion in the mixed-effects models.

| Explanatory Factors                                                        | Total | PCB-28, % |    |    | PCB-52, % |    |    | PCB-101, % |    |    | PCB-105, % |    |    | PCB-118, % |    |    | PCB-138, % |     |    | PCB-153, % |    |    | PCB-180, % |    |    |    |
|----------------------------------------------------------------------------|-------|-----------|----|----|-----------|----|----|------------|----|----|------------|----|----|------------|----|----|------------|-----|----|------------|----|----|------------|----|----|----|
|                                                                            |       | BR        | BH | WH | BR        | BH | WH | BR         | BH | WH | BR         | BH | WH | BR         | BH | WH | BR         | BH  | WH | BR         | BH | WH | BR         | BH | WH | BR |
| Resident is auto/truck/bus mechanic                                        | -0.01 | 0         | -1 | 0  | 0         | 0  | 0  | 0          | 0  | 0  | 1          | 0  | 2  | 1          | 0  | 0  | 0          | 0   | 0  | 0          | 0  | 0  | 0          | 0  | 0  | -1 |
| Resident is photographer/framer/photography teacher                        | -0.01 | 0         | 0  | 0  | -1        | -1 | 1  | 0          | 0  | -1 | 0          | 0  | -1 | 0          | 0  | 0  | 0          | -1  | 1  | 1          | -1 | 1  | 1          | 1  | 1  | -1 |
| Resident is employed in pesticide handling/production/formulation/mixing   | -0.01 | -2        | 0  | 0  | -2        | 0  | 0  | -2         | 1  | 0  | -1         | 0  | 0  | -2         | 0  | 1  | -3         | 0   | 0  | -2         | 0  | 0  | -2         | 0  | 1  |    |
| Case-control status <sup>a, b, d</sup>                                     | -0.02 | -4        | -1 | 0  | -3        | 0  | 0  | 0          | -1 | 0  | -2         | -1 | 0  | 0          | -1 | 0  | 0          | -1  | 0  | 2          | -1 | 0  | 10         | 1  | 0  |    |
| Resident is in manufacturing/assembly/industrial operations/product repair | -0.02 | 0         | 0  | 0  | -1        | 0  | -1 | -1         | 0  | -1 | 0          | 0  | -1 | 0          | 0  | -1 | -2         | 1   | -1 | -1         | 0  | -1 | -1         | 1  | -1 |    |
| Resident is farmer/farm or ranch worker                                    | -0.02 | 15        | -1 | 0  | 6         | -1 | 0  | -1         | 0  | -1 | -2         | 0  | -1 | -3         | 1  | -1 | -1         | 0   | 0  | -2         | 0  | -1 | -3         | 0  | -1 |    |
| Construction material is brick                                             | -0.03 | 1         | -1 | 0  | 1         | -1 | 0  | 1          | -1 | 0  | 1          | -1 | 0  | 1          | -1 | 0  | 0          | -1  | 0  | 1          | -1 | 0  | -2         | -1 | 0  |    |
| Windows open every day, all year <sup>b</sup>                              | -0.03 | -3        | 0  | 0  | 1         | -1 | 0  | 0          | -1 | 0  | 0          | -1 | 0  | 0          | -1 | 0  | 1          | -1  | 0  | 1          | -1 | 0  | 0          | -1 | 0  |    |
| Resident is engineer/envr. scientist                                       | -0.03 | -2        | 0  | 0  | -2        | 0  | 0  | -1         | 0  | 0  | 0          | 0  | -1 | 0          | 0  | 0  | -3         | -1  | 0  | 0          | 0  | 0  | -1         | 0  | 0  |    |
| Construction between rounds <sup>a, b</sup>                                | -0.03 | -2        | -5 | 3  | 0         | -1 | 0  | 0          | 0  | 0  | 0          | 0  | -1 | 0          | 0  | 0  | -2         | -19 | 11 | 0          | -1 | 0  | -1         | -2 | 1  |    |
| Residents remove outdoor shoes <sup>b</sup>                                | -0.03 | -1        | -1 | 0  | -1        | -2 | 2  | 0          | -1 | 2  | -1         | -1 | 3  | 0          | -2 | 2  | 0          | -4  | 2  | 0          | 0  | 0  | 0          | -1 | 2  |    |
| Cat or dog living at residence <sup>b</sup>                                | -0.04 | -1        | 0  | 0  | 0         | -1 | 0  | 0          | -1 | 0  | -1         | 0  | 0  | -1         | -1 | 0  | 0          | -1  | 0  | 0          | -1 | 0  | 1          | -1 | 0  |    |
| Resident is medical patient care worker                                    | -0.04 | -1        | -1 | 0  | -1        | -1 | 0  | -1         | -1 | 0  | 0          | 0  | 0  | -1         | 0  | 0  | 0          | 0   | 0  | 0          | 0  | 0  | 1          | 0  | 0  |    |
| Residence is apartment/duplex                                              | -0.04 | -4        | -1 | 0  | -5        | 0  | 0  | -4         | 0  | 0  | -7         | 1  | 0  | -5         | 1  | 0  | -3         | 1   | 0  | -4         | 0  | 0  | -3         | 0  | 0  |    |
| Resident is painter/wallpaperer                                            | -0.05 | -2        | -1 | 0  | -1        | 0  | 0  | -2         | 0  | 0  | -2         | -1 | 2  | -2         | -1 | 1  | -3         | -2  | 1  | -1         | 0  | 0  | -2         | -1 | 1  |    |
| Roofing between rounds <sup>b</sup>                                        | -0.06 | -5        | -4 | 2  | -4        | -1 | 1  | -5         | -1 | 3  | -4         | -1 | 2  | -3         | -1 | 1  | -16        | -11 | 9  | -5         | -1 | 2  | -7         | -1 | 2  |    |
| Residence is apartment                                                     | -0.08 | -4        | -1 | 0  | -6        | 0  | 0  | -7         | 0  | 0  | -5         | 0  | 0  | -7         | 0  | 0  | -3         | -1  | 0  | -4         | 0  | 0  | 0          | -1 | 0  |    |
| Vacuum frequency <sup>b</sup>                                              | -0.09 | 1         | 0  | 0  | -5        | 0  | 0  | -6         | 0  | -1 | -10        | 1  | -1 | -11        | 1  | 1  | -12        | 2   | 0  | -10        | 0  | 0  | -8         | 0  | 0  |    |
| Residence is urban                                                         | -0.10 | -2        | -1 | 0  | -7        | 0  | 0  | -7         | 0  | 0  | -9         | 0  | 0  | -6         | 0  | 0  | -5         | -1  | 0  | -5         | 0  | 0  | -7         | 0  | 0  |    |
| Household annual income                                                    | -0.21 | 0         | -1 | 0  | -22       | 1  | 0  | -25        | 2  | 0  | -29        | 3  | -1 | -25        | 3  | 0  | -30        | 5   | 0  | -29        | 3  | 0  | -39        | 4  | 0  |    |

Total = Total variance (summed over 8 PCB models) explained by the explanatory factor (negative values indicate that the factor does not explain variance in PCB concentrations);

BR = Percent of between-region variance from the random-effects model (Model 1) explained by the explanatory factor;

BH = Percent of intra-regional between-home variance from the random-effects model (Model 1) explained by the explanatory factor;

WH = Percent of within-home variance over time from the random-effects model (Model 1) explained by explanatory factor.

<sup>a</sup> Explanatory factor (or its interaction with the time trend) was included in Model 2

<sup>b</sup> We hypothesized that this factor could influence the indoor half-lives of PCBs, so an interaction between the time trend and this factor was considered for inclusion in Model 2

<sup>c</sup> Factor did not explain additional variance when included in Model 2

<sup>d</sup> For the purposes of discussion, an interaction between the time trend and case-control status was included in Model 2, despite the fact that this interaction did not explain additional variance in the model

**Supporting Information, Table S6.** Changes in estimated variance components for selected PCBs from the random-effects model<sup>a</sup> to the mixed-effects models.

| PCB     | Model 1; random-effects model; no explanatory variables |                 |                 | Model 2; mixed-effects model; all explanatory variables <sup>b</sup> |                 |                 |                 |                 |                 |
|---------|---------------------------------------------------------|-----------------|-----------------|----------------------------------------------------------------------|-----------------|-----------------|-----------------|-----------------|-----------------|
|         | $\sigma^2_{BR}$                                         | $\sigma^2_{BH}$ | $\sigma^2_{WH}$ | $\sigma^2_{BR}$                                                      | % <sub>BR</sub> | $\sigma^2_{BH}$ | % <sub>BH</sub> | $\sigma^2_{WH}$ | % <sub>WH</sub> |
| PCB-28  | 0.04                                                    | 0.25            | 0.36            | 0.005                                                                | 88              | 0.21            | 18              | 0.32            | 13              |
| PCB-52  | 0.10                                                    | 0.45            | 0.28            | 0.04                                                                 | 61              | 0.40            | 11              | 0.24            | 12              |
| PCB-101 | 0.21                                                    | 0.84            | 0.27            | 0.08                                                                 | 63              | 0.67            | 20              | 0.22            | 20              |
| PCB-105 | 0.23                                                    | 1.00            | 0.19            | 0.08                                                                 | 63              | 0.75            | 25              | 0.15            | 22              |
| PCB-118 | 0.25                                                    | 0.90            | 0.41            | 0.10                                                                 | 61              | 0.67            | 25              | 0.35            | 15              |
| PCB-138 | 0.12                                                    | 0.37            | 0.63            | 0.03                                                                 | 75              | 0.41            | 0               | 0.30            | 52              |
| PCB-153 | 0.19                                                    | 0.77            | 0.33            | 0.07                                                                 | 62              | 0.60            | 22              | 0.28            | 13              |
| PCB-180 | 0.15                                                    | 0.70            | 0.38            | 0.03                                                                 | 80              | 0.57            | 19              | 0.30            | 19              |

$\sigma^2_{BR}$  = Between-region variance.

$\sigma^2_{BH}$  = Intra-regional between-home variance.

$\sigma^2_{WH}$  = Within-home variance over time.

%<sub>BR</sub> = Percent of between-region variance from the random-effects model (Model 1) explained by the variables included in the mixed-effects model (Model 2).

%<sub>BH</sub> = Percent of intra-regional between-home variance from the random-effects model (Model 1) explained by the variables included in the mixed-effects model (Model 2).

%<sub>WH</sub> = Percent of within-home variance over time from the random-effects model (Model 1) explained by the variables included in the mixed-effects model (Model 2).

<sup>a</sup> In this table, Models 1 and 2 were fit for 448 observations including 403 samples collected from 202 homes during repeat sample collections and 45 duplicate samples; excluding 139 observations without covariate data (40 inter-batch quality control replicates and 87 samples with 10 duplicates from homes that were sampled during Round 1 only).

<sup>b</sup> Fixed effects included in model 2 are residential construction date, residential square footage, mother's age, vacuum-cleaner type, and time between sampling rounds for four groups (*i.e.*, for case households, for households that installed flooring between sampling rounds, for households that did construction between sampling rounds, and for all other households).

**Supporting Information, Table S7.** Spearman rank correlation ( $r_s$ ) between PCB concentrations in dust samples collected during two sampling rounds, stratified by the interval of time between rounds.

| PCB     | 3-5 years between rounds |       | 6-8 years between rounds |       |
|---------|--------------------------|-------|--------------------------|-------|
|         | $N$                      | $r_s$ | $N$                      | $r_s$ |
| PCB-28  | 139                      | 0.51  | 62                       | 0.61  |
| PCB-52  | 139                      | 0.60  | 62                       | 0.66  |
| PCB-101 | 139                      | 0.65  | 62                       | 0.72  |
| PCB-105 | 139                      | 0.68  | 62                       | 0.71  |
| PCB-118 | 139                      | 0.70  | 62                       | 0.71  |
| PCB-138 | 139                      | 0.55  | 62                       | 0.71  |
| PCB-153 | 139                      | 0.62  | 62                       | 0.69  |
| PCB-180 | 139                      | 0.57  | 62                       | 0.68  |

**Supporting Information Table S8.** Indoor half-lives of selected PCBs based on regression estimates from Model 2<sup>a</sup>

| Group                                                                   | PCB-28 | PCB-52 | PCB-101 | PCB-105 | PCB-118 | PCB-138 | PCB-153 | PCB-180 |
|-------------------------------------------------------------------------|--------|--------|---------|---------|---------|---------|---------|---------|
| All households (population average) <sup>b</sup>                        | 12     | 16     | 15      | 18      | 15      | 5       | 17      | 11      |
| Case households <sup>c</sup>                                            | 12     | 10     | 9       | 9       | 9       | 4       | 11      | 10      |
| Households that installed flooring between sampling rounds <sup>d</sup> | 8      | 11     | 9       | 9       | 9       | 4       | 9       | 8       |
| Households that did construction between sampling rounds <sup>e</sup>   | 18     | 40     | 47      | 68      | 59      | 7       | 39      | 26      |

<sup>a</sup> Indoor half-life,  $t_{1/2} = \frac{\ln(0.5)}{\beta_{time}}$

<sup>b</sup>  $\beta_{time} = 1.00 * \beta_{time-reference} + 0.38 * \beta_{time-cases} + 0.45 * \beta_{time-floor} + 0.39 * \beta_{time-construction}$  ;

where  $\beta_{time-reference}$ ,  $\beta_{time-cases}$ ,  $\beta_{time-floor}$ , and  $\beta_{time-construction}$  are the regression coefficients for the four time trends included in Model 2 and 38%, 45%, and 39% are the proportion of case households, households that installed flooring between sampling rounds, and households that did construction between sampling rounds in the study population, respectively.

<sup>c</sup>  $\beta_{time} = 1.00 * \beta_{time-reference} + 1.00 * \beta_{time-cases} + 0.45 * \beta_{time-floor} + 0.39 * \beta_{time-construction}$

<sup>d</sup>  $\beta_{time} = 1.00 * \beta_{time-reference} + 0.38 * \beta_{time-cases} + 1.00 * \beta_{time-floor} + 0.39 * \beta_{time-construction}$

<sup>e</sup>  $\beta_{time} = 1.00 * \beta_{time-reference} + 0.38 * \beta_{time-cases} + 0.45 * \beta_{time-floor} + 1.00 * \beta_{time-construction}$

**Figure S1.** Regional variability in median (interquartile range) PCB-153 concentrations (ng/g) in dust samples collected from 288 residences in the California Childhood Leukemia Study from 2001-2007.

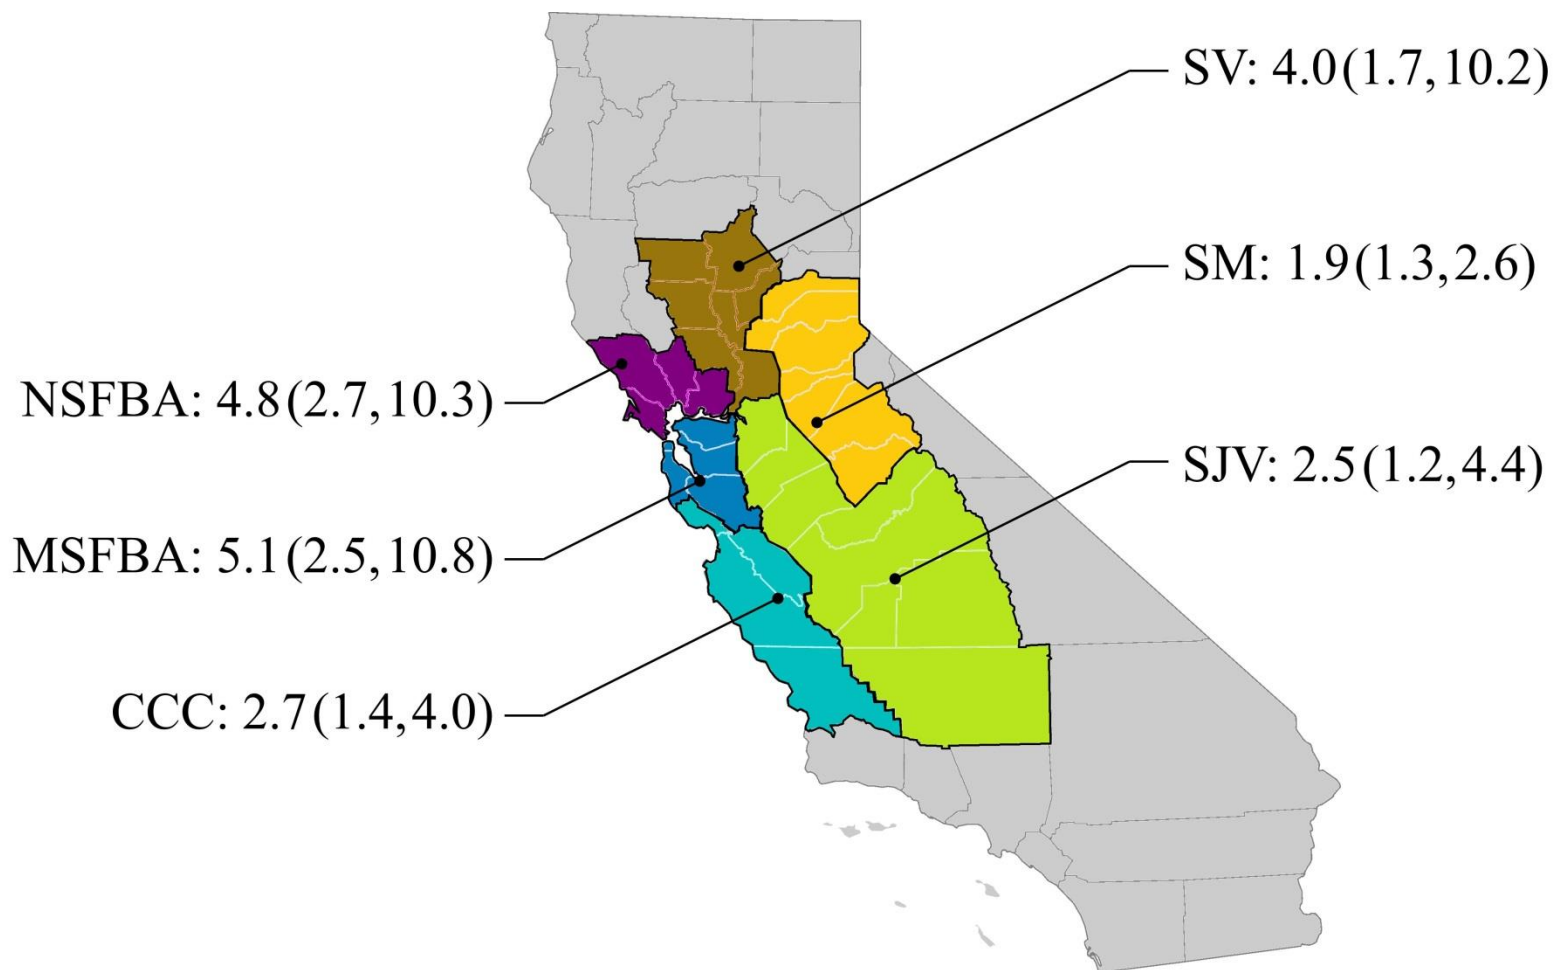

BLUE = the metropolitan San Francisco Bay Area (MSFBA, includes Alameda, Contra Costa, Santa Clara, San Francisco, and San Mateo counties); PURPLE = the northern San Francisco Bay Area (NSFBA, includes Marin, Napa, Solano, and Sonoma counties); BROWN = the Sacramento Valley (SV, includes Butte, Colusa, Glenn, Sacramento, Sutter, Yolo, and Yuba counties); ORANGE = the Sierra Mountains (SM, includes Amador, Calaveras, El Dorado, Mariposa, Nevada, Placer, and Tuolumne counties); GREEN = the San Joaquin Valley (SJV, includes Fresno, Kern, Kings, Madera, Merced, San Joaquin, Stanislaus, Tulare counties); TEAL = the California central coast (CCC, includes Monterey, San Benito, San Luis Obispo, and Santa Cruz counties).

**Figure S2.** Within-home and between-home variability in PCB-153 concentrations in dust collected from 201 residences in the California Childhood Leukemia Study. Each arrow represents concentrations measured in one home during the two sampling rounds; arrows pointing down represent a decrease in concentration from Round 1 to Round 2; arrows pointing up represent an increase. The vertical scale is plotted on the log (base 5) scale. Homes are sorted by their Round 1 PCB-153 concentration, from left to right.

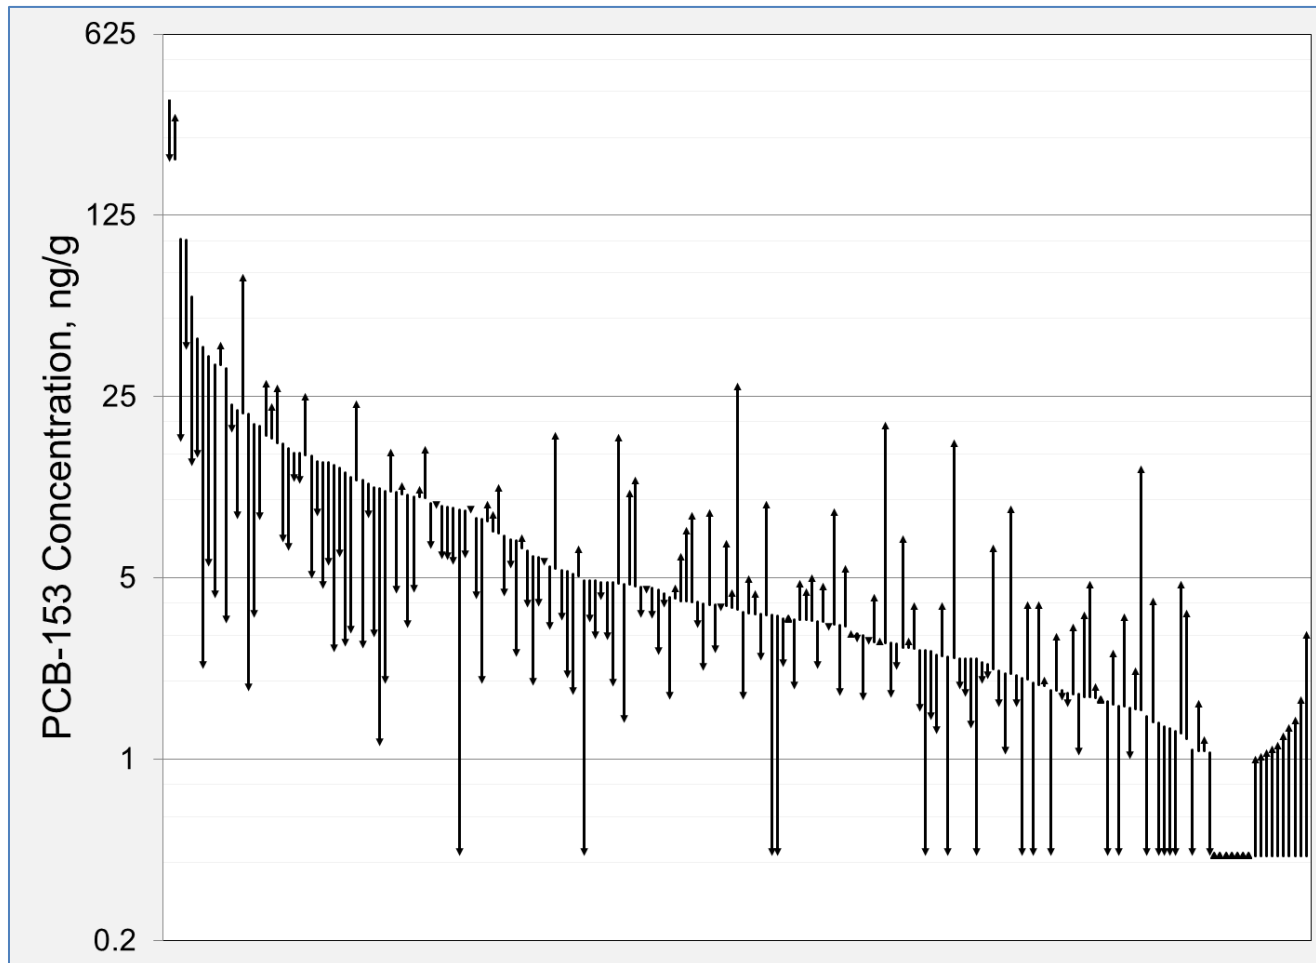

Supplement: NIHMS549639-supplement-1_si_001.pdf [file NIHMS549639-supplement-1_si_001.pdf]
